# Supplementary material
Source: bioRxiv or medRxiv preprint supplement (https://www.biorxiv.org/highwire/filestream/91591/field_highwire_adjunct_files/0/217737-1.pdf)
Supplement: Supplementary file [file 217737-1.pdf]

# 1074 **Supplementary Material**

## 1075 **SUPPLEMENTARY TEXT**

### 1076 **Application of kNN-smoothing to scRNA-Seq data of mouse myeloid progenitor cells**

1077 To further compare our method to a previously proposed approach (Dijk et al. 2017), we applied our  
1078 smoothing algorithm to a scRNA-Seq dataset of mouse myeloid progenitor cells (Paul et al. 2015). We  
1079 generated a heatmap of characteristic genes for 19 clusters identified by the authors of the original study, as  
1080 well as for important cell surface markers, in a way that allows a direct comparison to the results obtained  
1081 by Dijk et al. (2017) (see Figure S9a,b). We found that even though k-nearest neighbor smoothing is  
1082 much simpler than their approach, our method performed similarly well in generating smooth expression  
1083 profiles for cells belonging to the same cluster, while respecting cluster boundaries.

1084 We similarly examined the pairwise correlations of cell surface markers, and obtained qualitatively  
1085 similar results to Dijk et al. (2017) (see Figure S9c-e). As in their study, recovering cell type-specific  
1086 co-expression patterns depended on the amount of smoothing applied. Some differences were observed in  
1087 the precise shapes of the associations, but it was not clear how much of this was due to differences in  
1088 normalization and/or scaling used for visualization. In summary, for this particular dataset, the diffusion-  
1089 based approach by Dijk et al. (2017) and our algorithm gave qualitatively similar results, although there  
1090 were some quantitative differences.

## SUPPLEMENTARY FIGURES

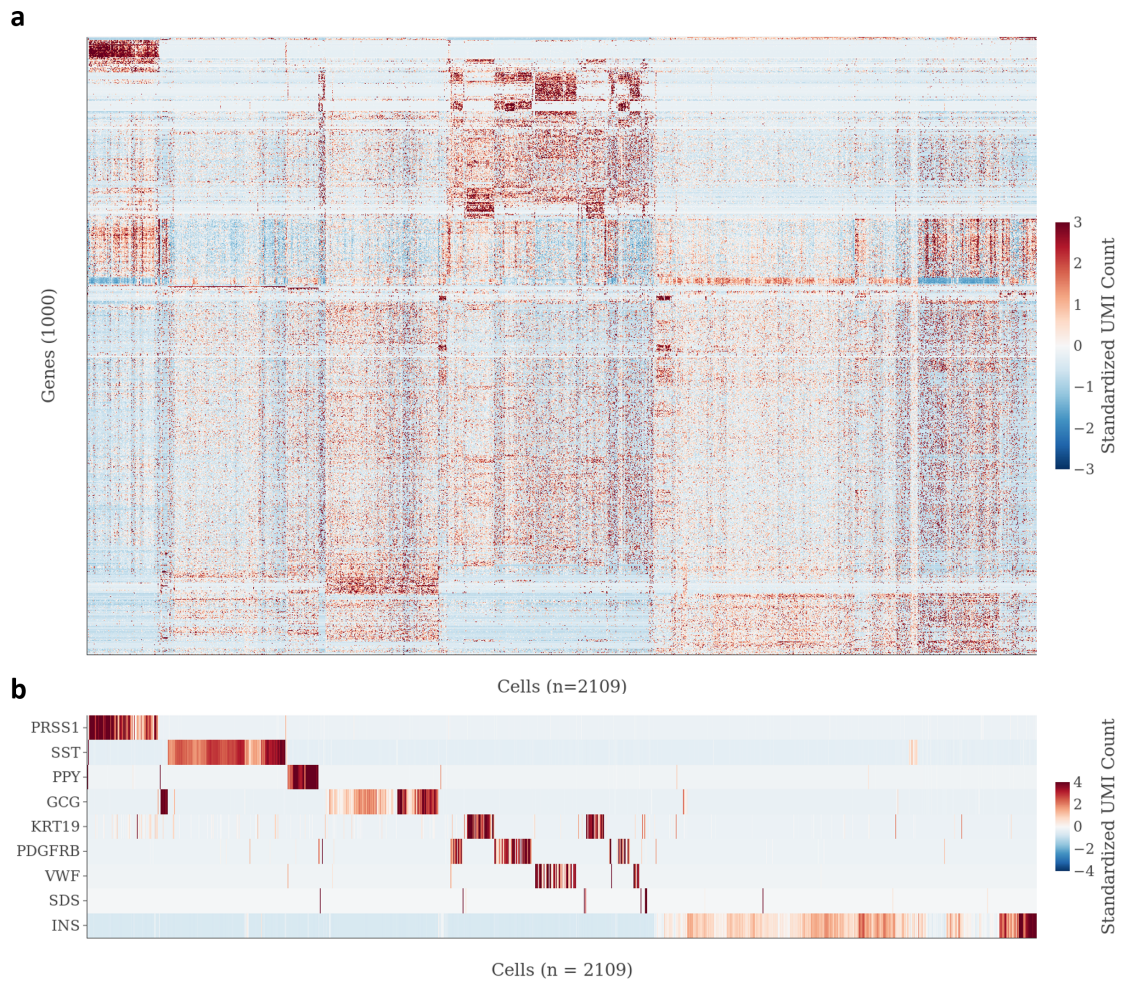

**Figure S1. Hierarchical clustering of unsmoothed scRNA-Seq data from human pancreatic islet tissue.** Shown is the PANCREAS dataset, from a study by Baron et al. (2016). **a** Heatmap showing the results of hierarchical clustering of genes and cells performed on the unsmoothed data, after filtering for the 1,000 most variable genes, as in Figure 4b). **b** Expression of cell type-specific marker genes, as in Figure 4d, but with genes reordered to accommodate the new clustering results.

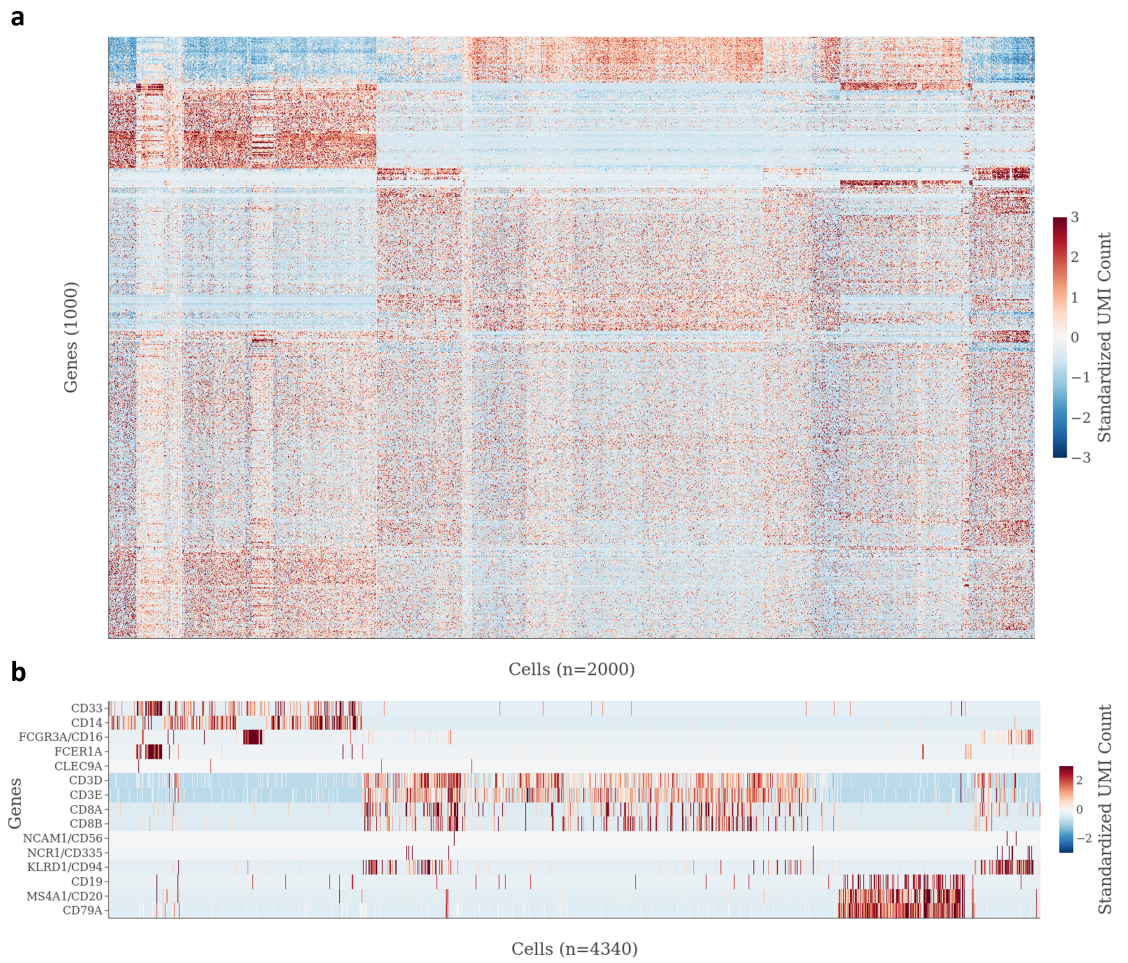

**Figure S2. Hierarchical clustering of unsmoothed scRNA-Seq data from human peripheral blood mononuclear cells.** Shown is the PMBC dataset. **a** Heatmap showing the results of hierarchical clustering of genes and cells performed on the unsmoothed data, after filtering for the 1,000 most variable genes, as in [Figure 5b](#)). **b** Expression of cell type-specific marker genes, as in [Figure 5d](#).

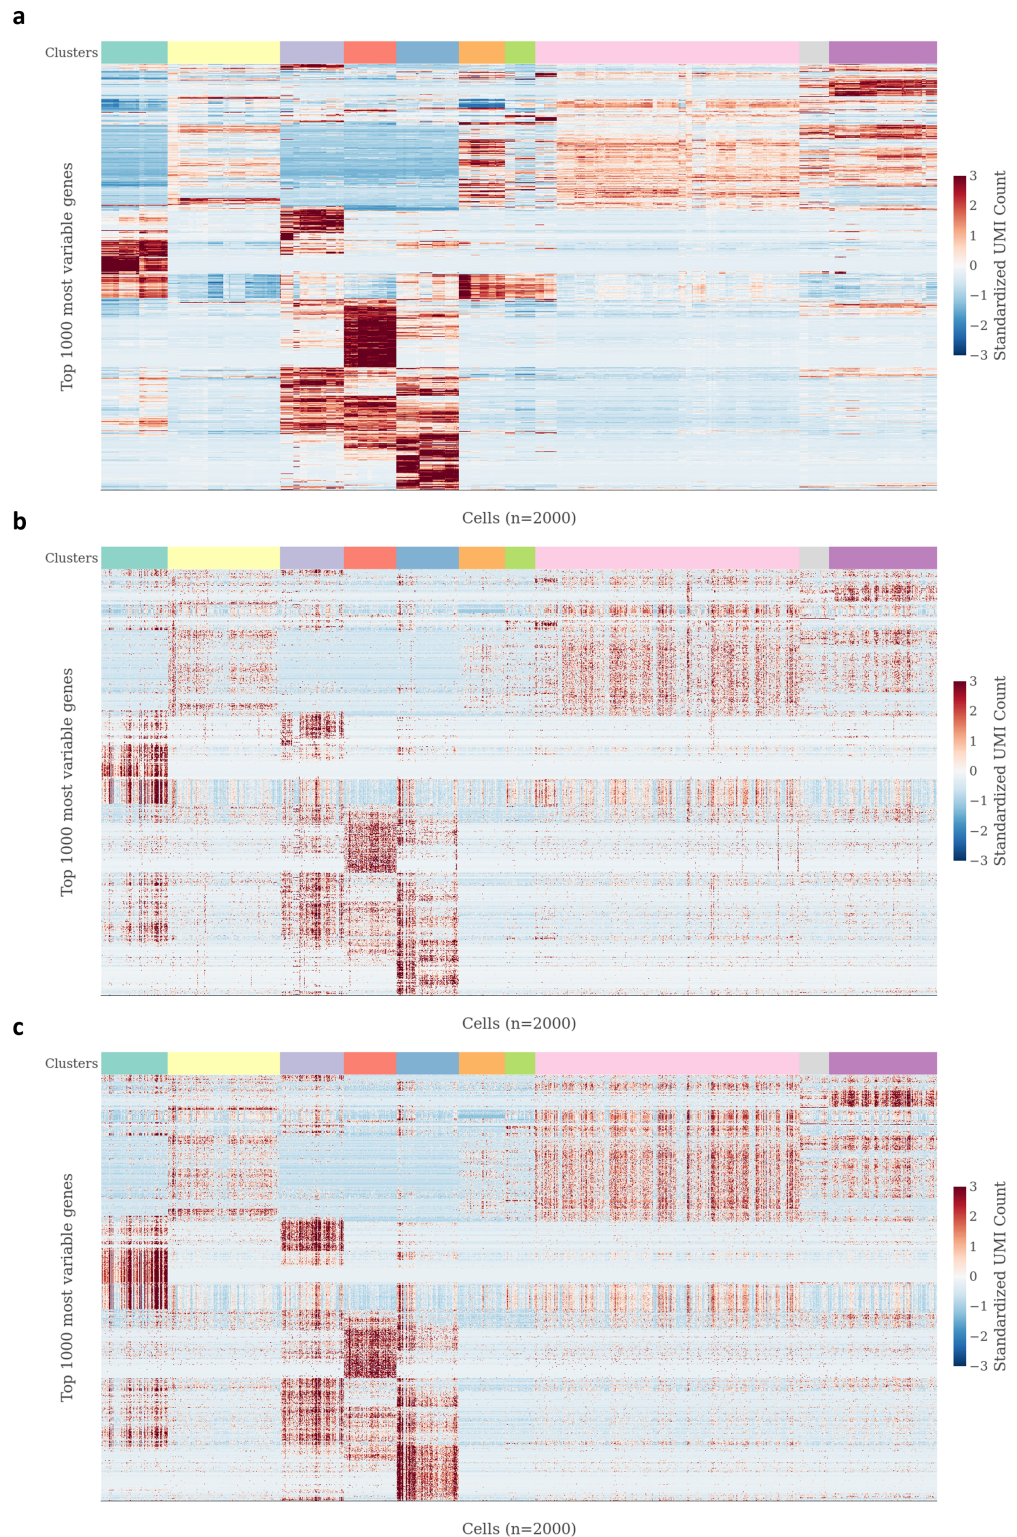

**Figure S3. Comparison of smoothed, unsmoothed, and simulated scRNA-Seq data for human pancreatic islet tissue.** All panels show heatmaps of the 1,000 most variable genes, where genes and cells are ordered according to hierarchical clustering results, obtained using the 2,000 most variable genes in the smoothed PANCREAS data (with  $k=15$ ). Assignments of cells to one of 10 clusters (based on the same hierarchical clustering results) are shown on top of each heatmap. **a** Smoothed data. **b** Unsmoothed data. **c** Simulated data. Only a random subset of 2,000 cells (out of 2,109 cells) is shown in each heatmap.

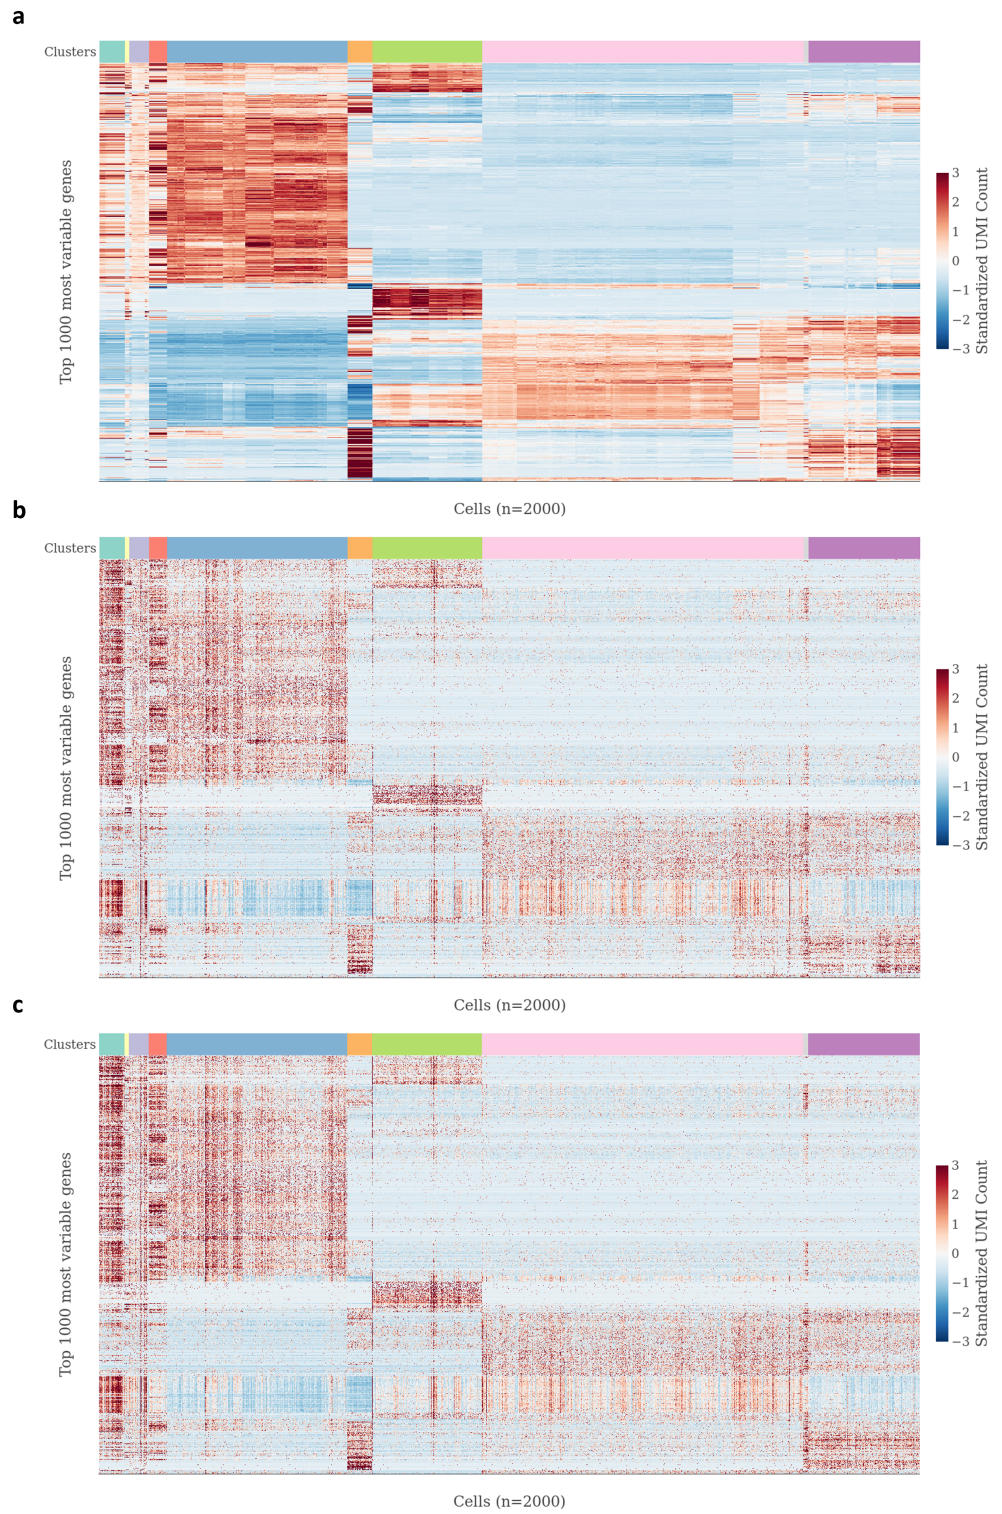

**Figure S4. Comparison of smoothed, unsmoothed, and simulated scRNA-Seq data for human peripheral blood mononuclear cells.** See [Figure S3](#) for descriptions of panels (a)-(c).

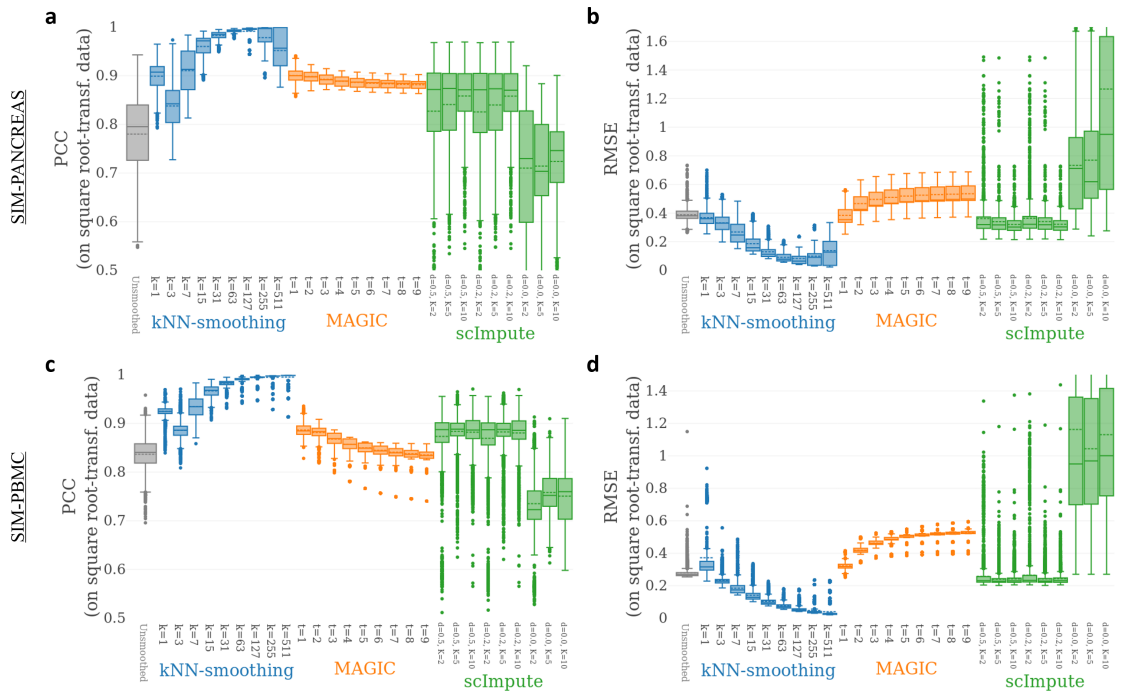

**Figure S5. Accuracy of kNN-smoothing in comparison to other smoothing methods for simulated scRNA-Seq datasets. a, b** Accuracy on SIM-PANCREAS dataset. **c, d.** Accuracy on SIM-PBMC dataset. This figure mirrors Figure 6, but shown are accuracy measures calculated on square root-transformed data, instead of  $\log_2$ -transformed data (see Methods for details).

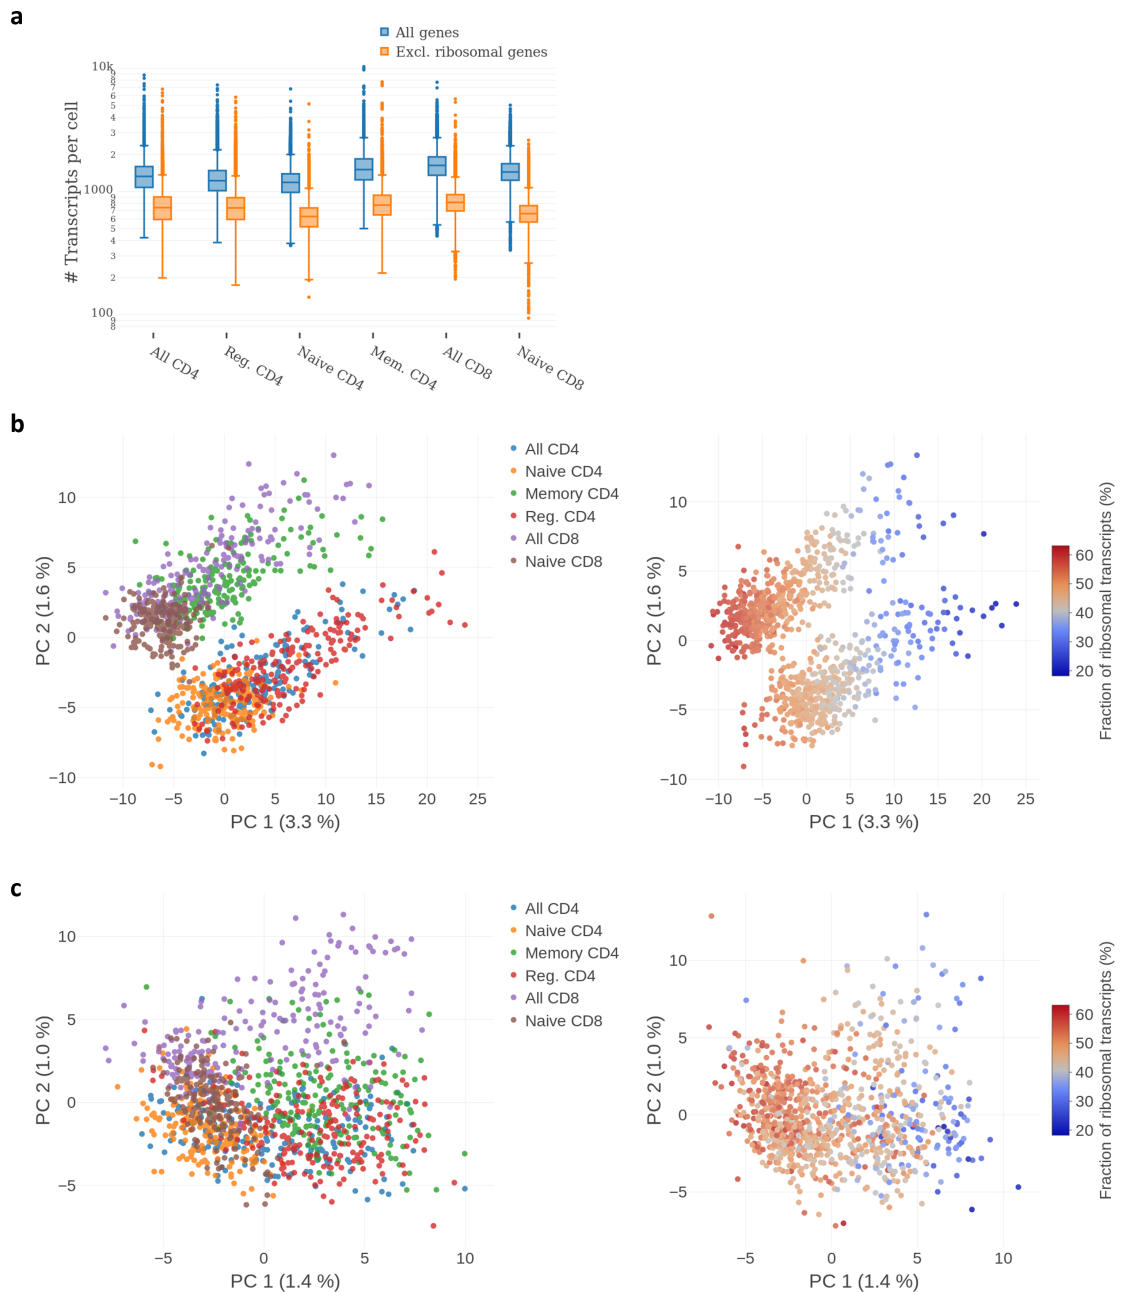

**Figure S6. Transcript counts and batch effects of T cell subset scRNA-Seq datasets analyzed. a** Box plot of the total transcript counts per cell for six T cell datasets from Zheng et al. (2017), with and without transcripts belonging to genes encoding ribosomal proteins. **b** Principal component analysis (on median-normalized and Freeman-Tukey-transformed data) for all six datasets combined ( $n=6,000$ ; see Methods). Left, cells are color-coded by the dataset to which they belong. For better readability, only 200 randomly selected cells per dataset are shown. Right, cells are colored by the fraction of ribosomal gene transcripts. For better readability, only 1,000 randomly selected genes are shown. **c** Principal component analysis for combined data, as in (b), but after excluding all ribosomal genes.

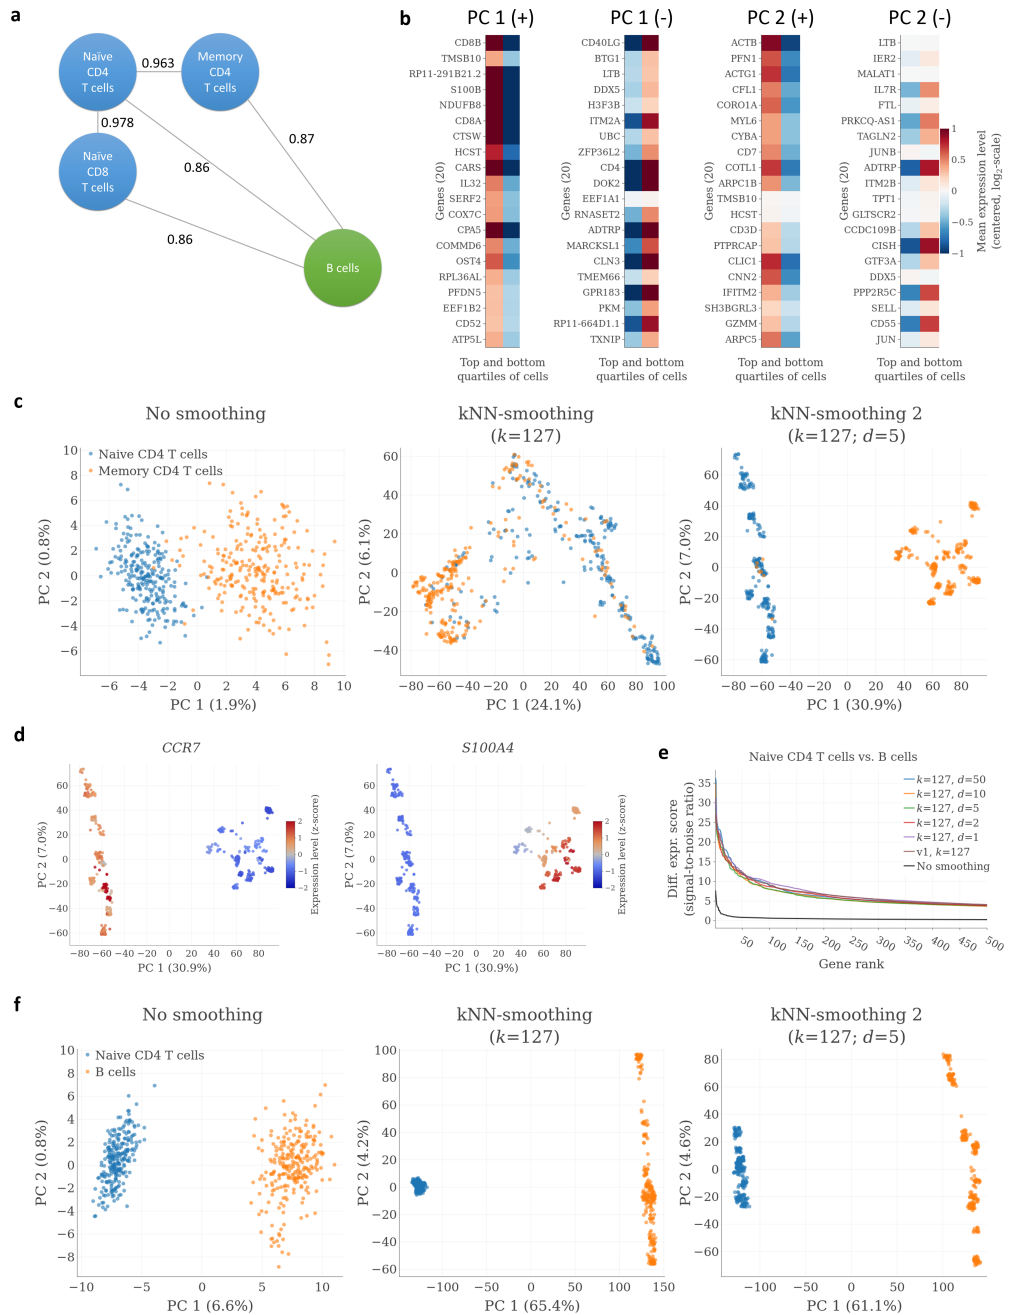

**Figure S7. Application of kNN-smoothing and kNN-smoothing 2 to T cell subset and B cell scRNA-Seq data.** **a** Expression profile similarities between T cell subsets and B cells, quantified as the Pearson correlation coefficient of the aggregated expression profiles after square root-transformation. **b** Differences in average expression in the top and bottom quartiles of cells, ranked by PC scores, for genes with the 20 largest and smallest PC loadings in the dataset composed of profiles from naive CD4 and CD8 T cells. **c** PCA on unsmoothed and smoothed data for the dataset composed of profiles from naive CD4 and memory CD4 T cells, as in Figure 8a. **d** Expression of *CCR7* and *S100A4*, marker genes for naive and memory T cells, respectively, overlaid on a PCA plot, as in Figure 8b. **e** Comparison of smoothing performance on the dataset composed of profiles from naive CD4 T cells and B cells, for smoothing with different parameter settings, as in Figure 8c. **f** PCA on unsmoothed and smoothed data for the dataset composed of profiles from naive CD4 and B cells, as in Figure 8a.



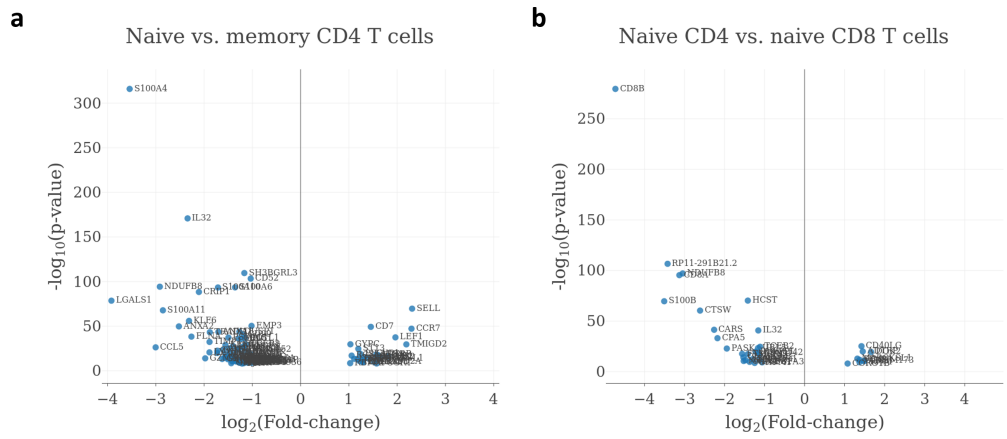

**Figure S8. Identification of marker genes for specific T cell subsets from scRNA-Seq data of bead-enriched samples.** **a** Volcano plot showing differences in gene expression level between naive CD4 and memory CD4 T cells ( $n=1,000$  for each subset). The x-axis shows fold-change between average expression levels. The y-axis shows differential expression p-values, calculated using a t-test on FT-transformed expression values (see [Methods](#)). **b** Volcano plot, as in **a**, for a comparison between naive CD4 and naive CD8 T cells.

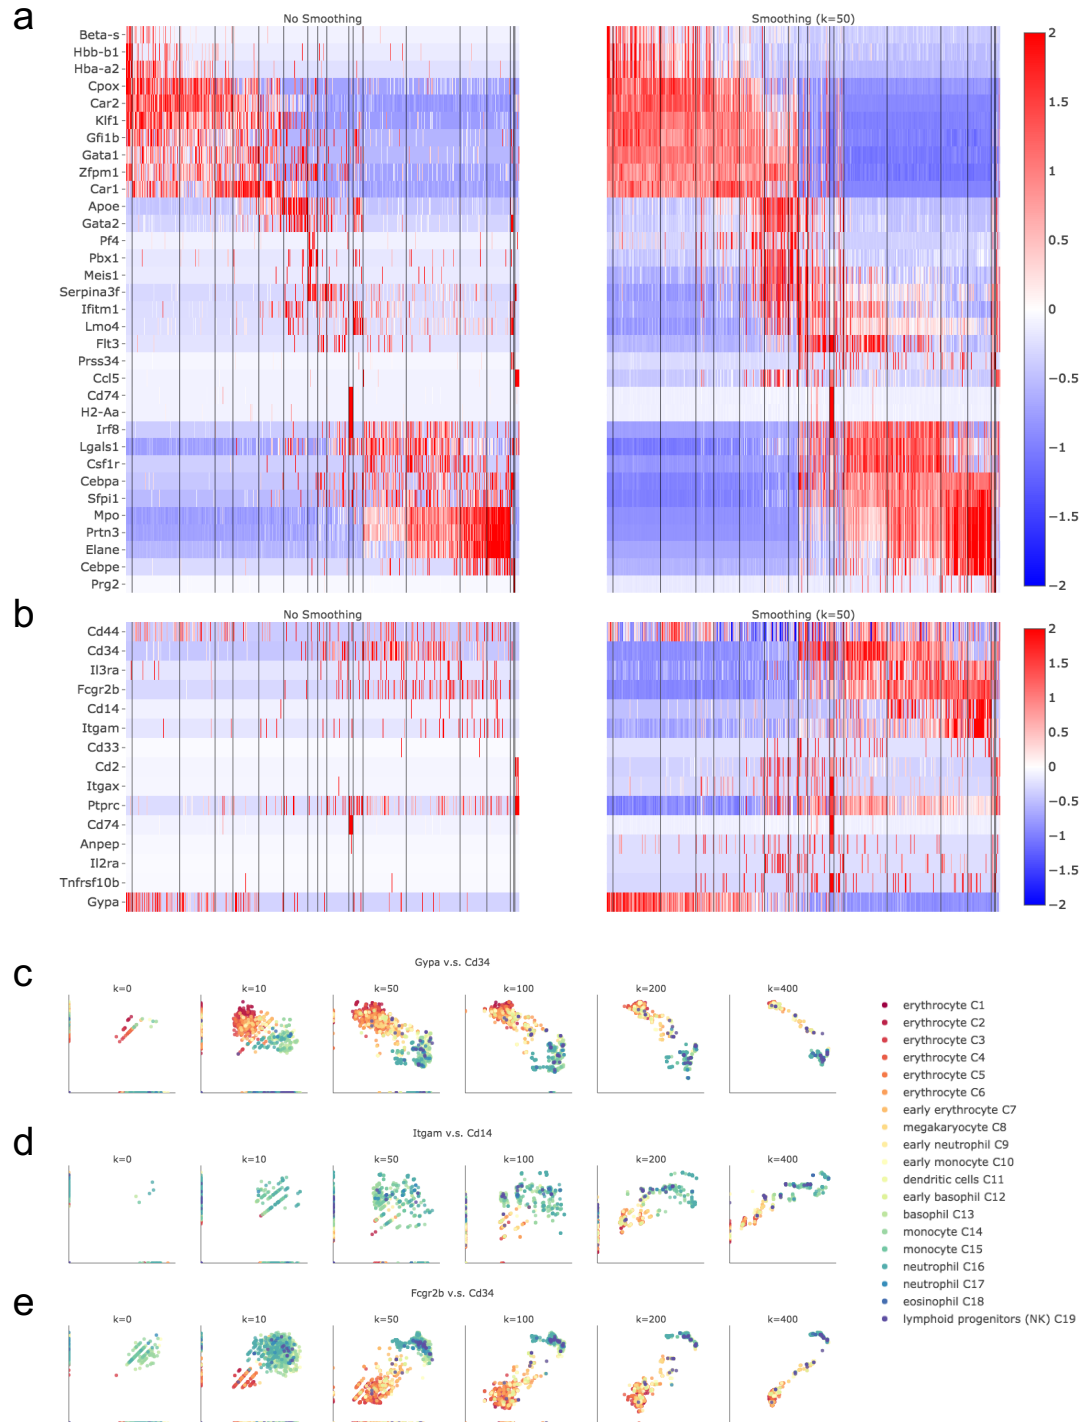

**Figure S9. Application of k-nearest neighbor smoothing to scRNA-Seq data of mouse myeloid progenitors.** This figure is directly comparable to Figure 3 from Dijk et al. (2017). (a, b) Heatmaps of the expression matrices for (a) 33 key hematopoietic genes, and (b) 15 surface marker genes of immune cells, as defined in Paul et al. (2015), before smoothing (left) and after smoothing (right). Gene are ordered as same as shown in Dijk et al. (2017), Figure 3. Cells from left to right are ordered in clusters (C1-C19) as defined in Paul et al. (2015). c-e) Scatter plots of expressions showing the recovery of relationships of three pairs of immune marker genes after smoothing with different  $k$  ( $k=0, 10, 50, 100, 200, 400$ ). Each dot is an individual cell colored by the 19 clusters used in a. See Methods for details.
